# Supplementary material for: High-Performance Self-Powered Ultraviolet Photodetector Based on Nano-Porous GaN and CoPc p–n Vertical Heterojunction
Source: MDPI journal article supplement (doi:10.3390/nano9091198), 2019-08-26
Supplement: s1 [file s1]

# High-Performance Self-Powered Ultraviolet Photodetector Based on Nano-Porous GaN and CoPc $p$ - $n$ Vertical Heterojunction

Yan Xiao <sup>1,†</sup>, Lin Liu <sup>2,3,†</sup>, Zhi-hao Ma <sup>1</sup>, Bo Meng <sup>1</sup>, Su-Jie Qin <sup>3,\*</sup>, Ge-Bo Pan <sup>2,\*</sup>

<sup>1</sup> Key Laboratory of Optoelectronic Devices and Systems of Ministry of Education and Guangdong Province, College of Optoelectronic Engineering, Shenzhen University, Shenzhen 518060, China

<sup>2</sup> Suzhou Institute of Nano-tech and Nano-bionics, Chinese Academy of Sciences, Suzhou 215123, China

<sup>3</sup> Department of Health and Environmental Sciences, Xi'an Jiaotong-Liverpool University, Suzhou 215123, China

\* Correspondence: gbpan2008@sinano.ac.cn (G.-B.P.); sujie.qin@xjtlu.edu.cn (S.-J.Q.); Tel.: +86-0512-62872663 (G.-B.P. & S.-J.Q.)

† These authors contributed equally to this work.

Received: 31 July 2019; Accepted: 21 August 2019; Published: date

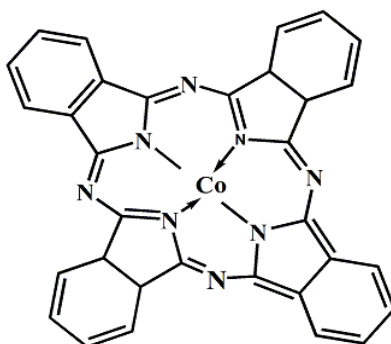

**Figure S1.** The chemical structure of CoPc.

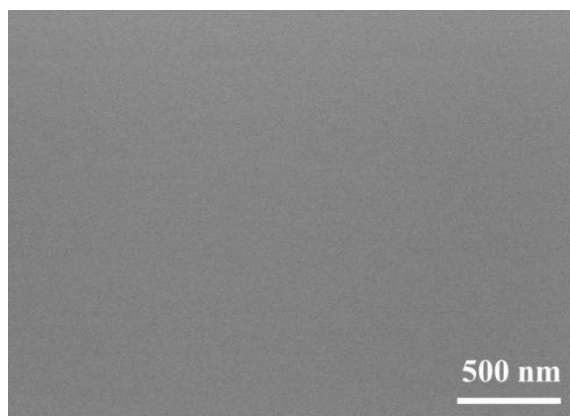

**Figure S2.** SEM images of pure flat-GaN.

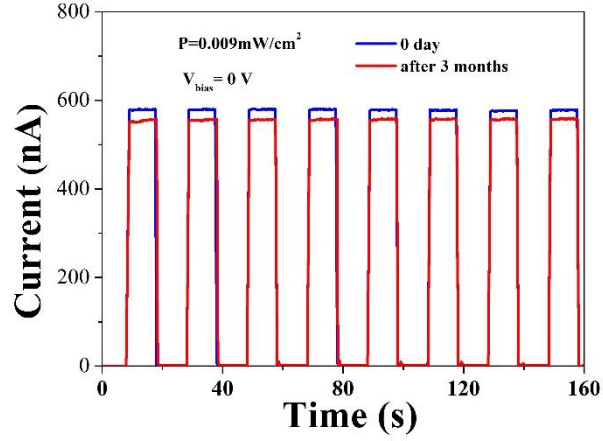

**Figure S3.** Time-dependent on/off switching of the device at day one and after 3 months under 365 nm light illumination, the light intensity is 0.009 mW/cm<sup>2</sup> and bias potential is 0 V.

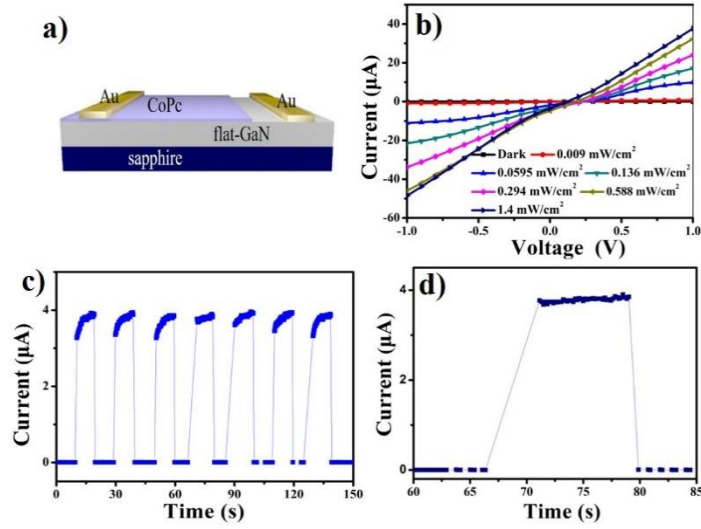

**Figure S4.** (a) Schematic of a PD device based on CoPc/flat-GaN p-n vertical heterojunction. (b) I-V curves of the PD under 365 nm light with different power density illumination. (c) Time-dependent on/off switching of the device under 365 nm light illumination, the light intensity is 1.4 mWcm<sup>-2</sup> and bias potential is 0 V. (d) The enlarged portion of one response and the recover process.
